# Supplementary material
Source: PubMed Central journal article supplement (PMC3765079)
Supplement: NIHMS364020-supplement-1.pdf [file NIHMS364020-supplement-1.pdf]

Supplementary Figures.

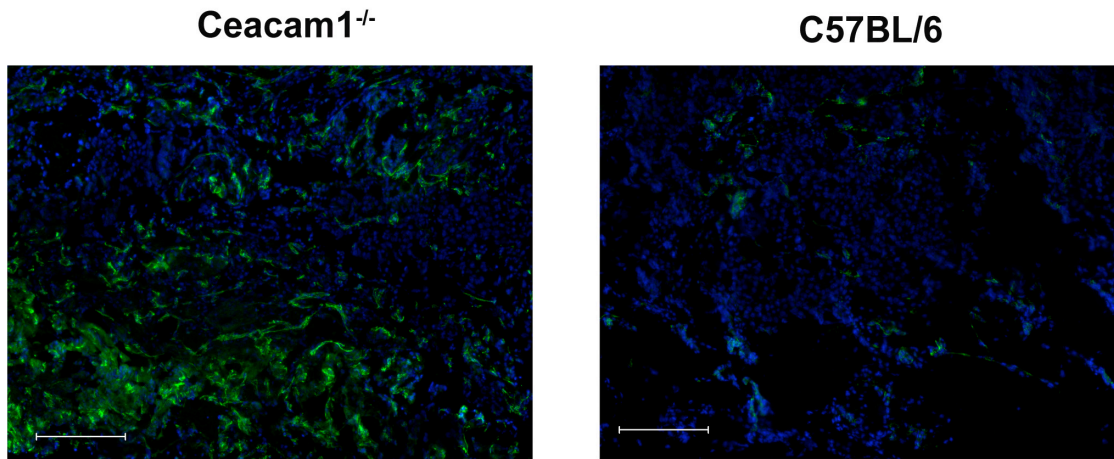

**Figure S1. B16 tumors from Ceacam1<sup>-/-</sup> mice have increased vascular density compared to WT mice.** Representative immunofluorescent analysis of CD31 expression in tumors from Ceacam1<sup>-/-</sup> mice vs WT controls.

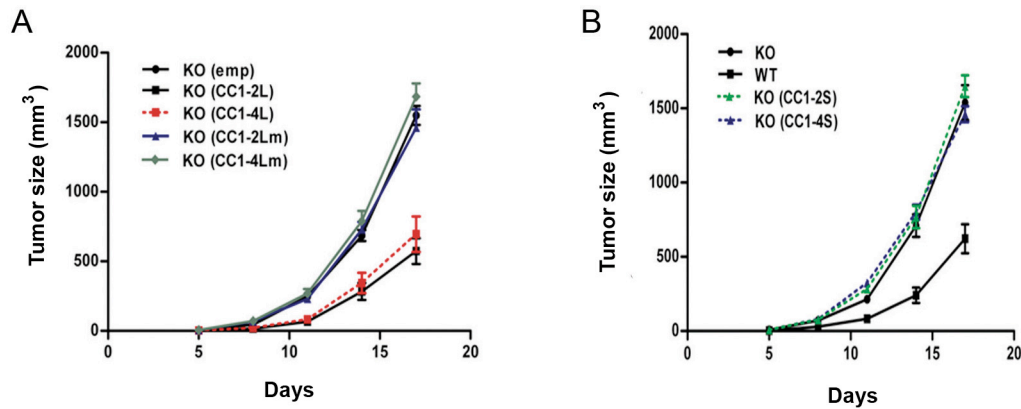

**Figure S2. B16 tumor growth in bone marrow reconstituted CEACAM1<sup>-/-</sup> mice. A.** CEACAM1<sup>-/-</sup> (KO) mice were reconstituted with bone marrow stem cells expressing empty vector (emp), CEACAM1-2L (CC1-2L), CEACAM1-4L (CC1-4L) or ITIM mutated versions (CC1-2Lmut or CC1-4Lmut) and tumor size measured over 17 days. **B.** Same experiment with short isoforms of CEACAM1 (CC1-2S or CC1-4S). Data from two independent experiments.

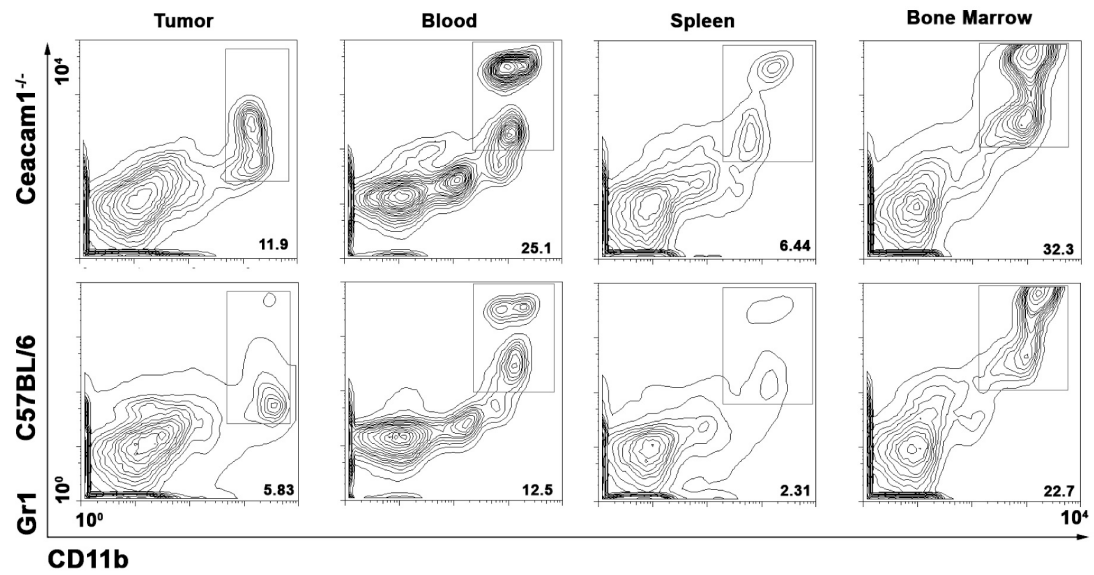

**Figure S3. Increased expression of Gr1+CD11b+ myeloid cells in tumor, blood, spleen and bone marrow of Ceacam1<sup>-/-</sup> mice compared to WT controls.** Representative flow analysis of each tissue taken from animals 17 days after tumor implantation.

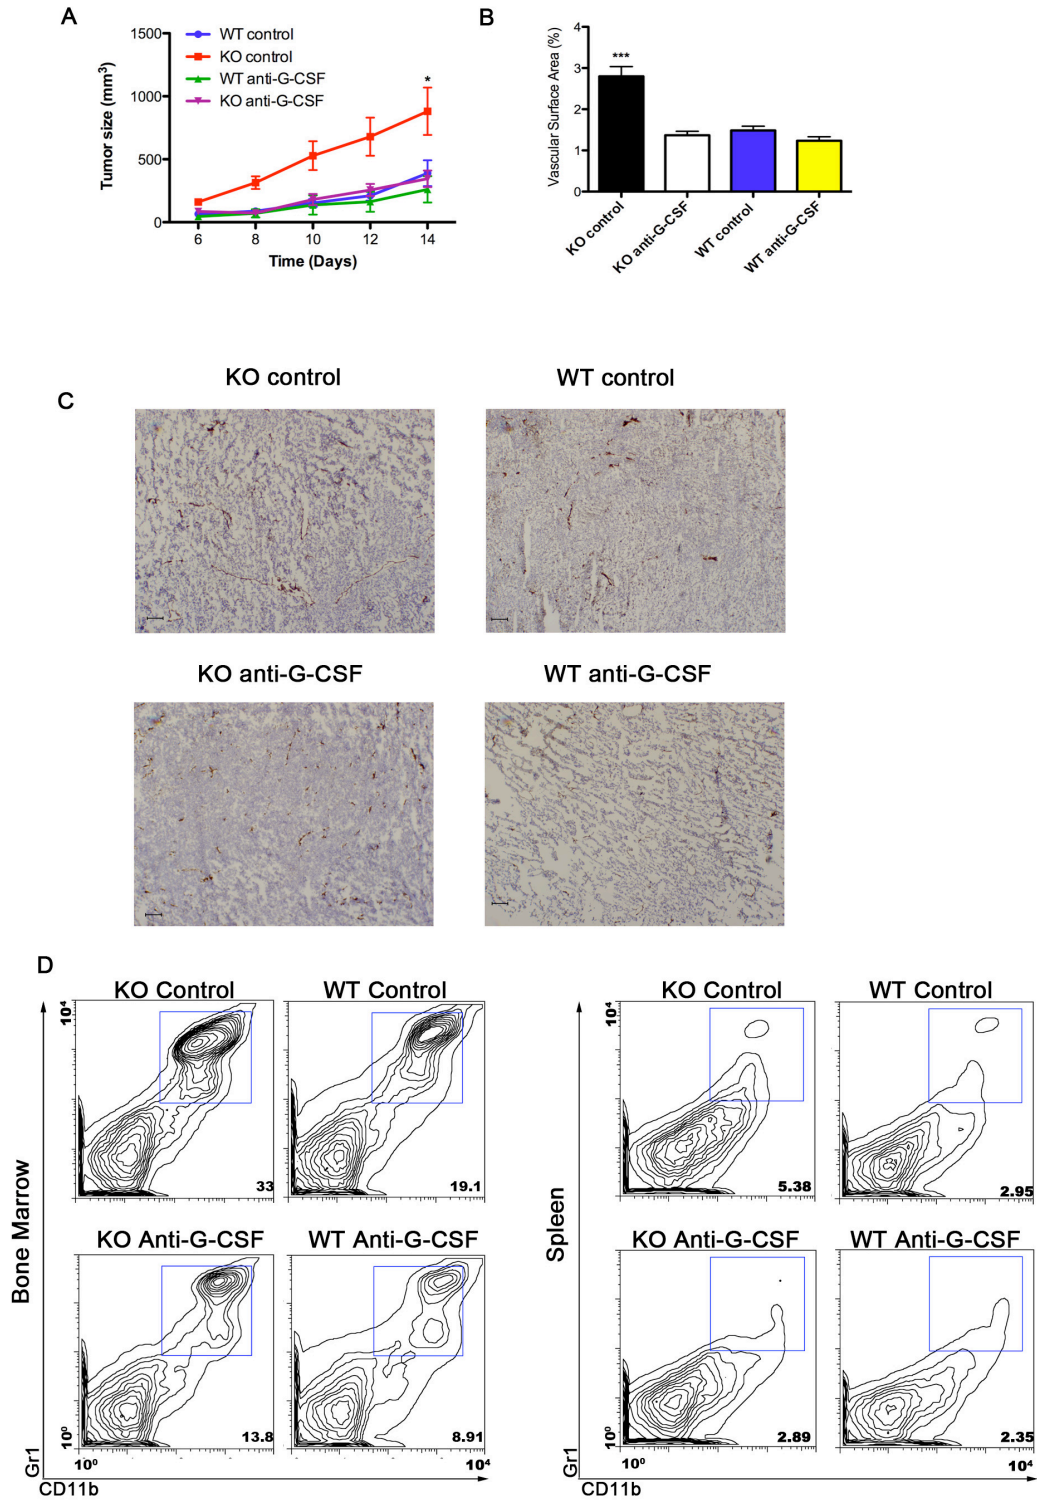

**Figure S4. Anti-G-CSF treatment reduces tumor size, vascular density and infiltrating Gr1<sup>+</sup> cells in tumor bearing Ceacam1<sup>-/-</sup> mice compared to WT controls. A.** Tumor size over time in antibody treated vs isotype control treated mice (n=6 mice in each group, \*P<0.01). **B.** Quantitation of blood vessels based on CD31 staining (\*\*P<0.001). **C.** Representative immunohistochemical staining for CD31 from tumors in antibody vs isotype control treated mice. **D.** Flow analysis of Gr1<sup>+</sup>CD11b cells from tumors in antibody vs isotype control treated mice.

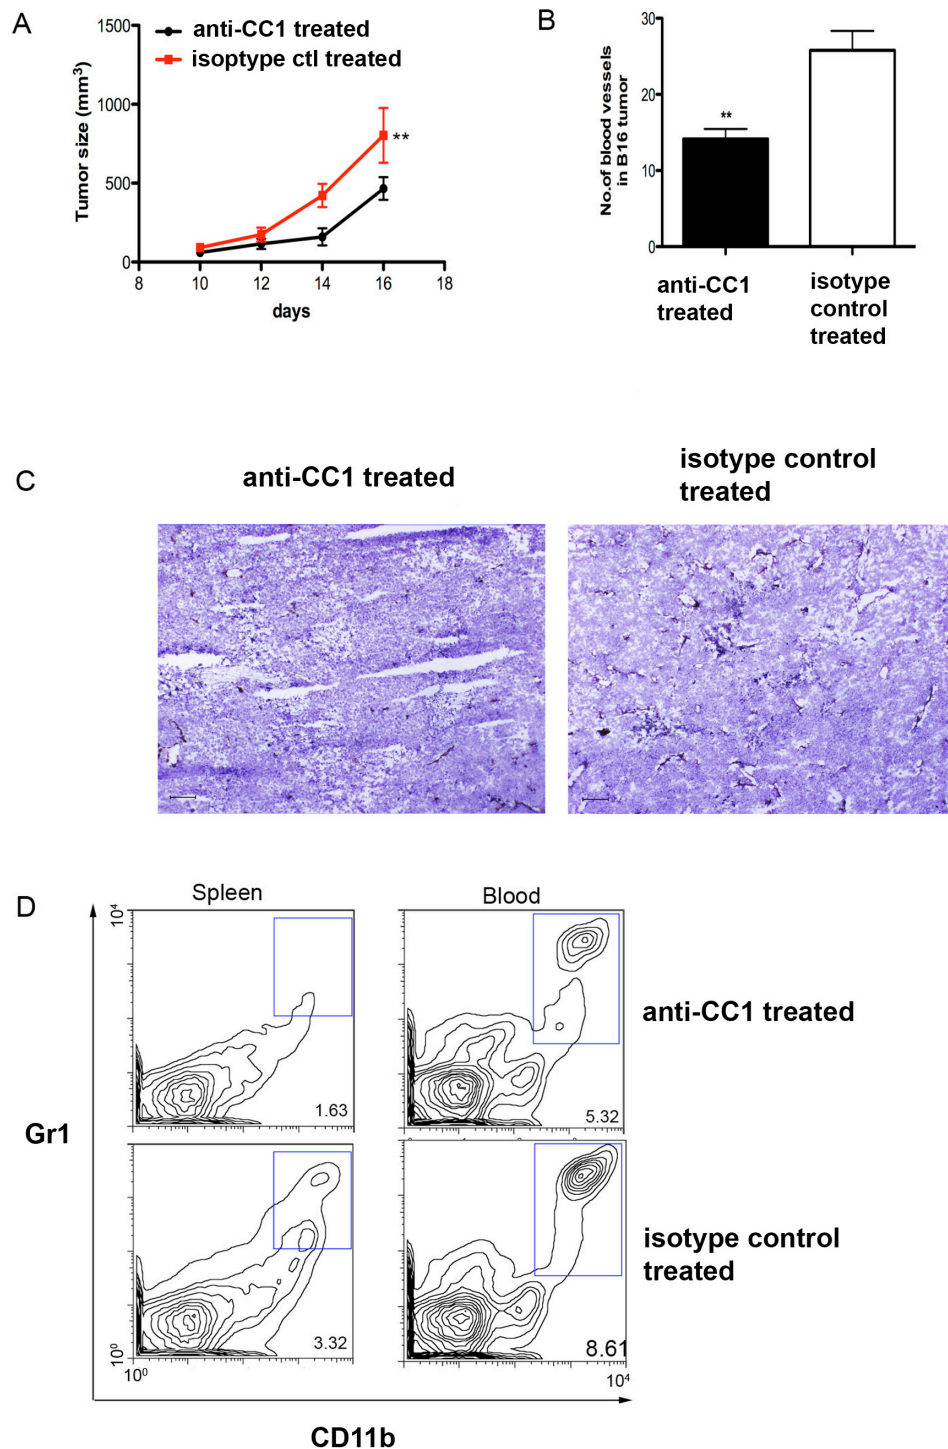

**Figure S5. Anti-CEACAM1 treatment reduces tumor size, vascular density and numbers of Gr1+ cells in tumor bearing WT mice.** **A.** Tumor size over time in antibody treated vs isotype control treated WT mice (n=6 mice in each group, \*\*P<0.001). **B.** Quantitation of blood vessels based on CD31 staining (\*\*P<0.001). **C.** Representative immunohistochemical staining for CD31 from tumors in antibody vs isotype control treated mice. **D.** Flow analysis of Gr1+CD11b cells from spleen and blood in antibody vs isotype control treated mice.

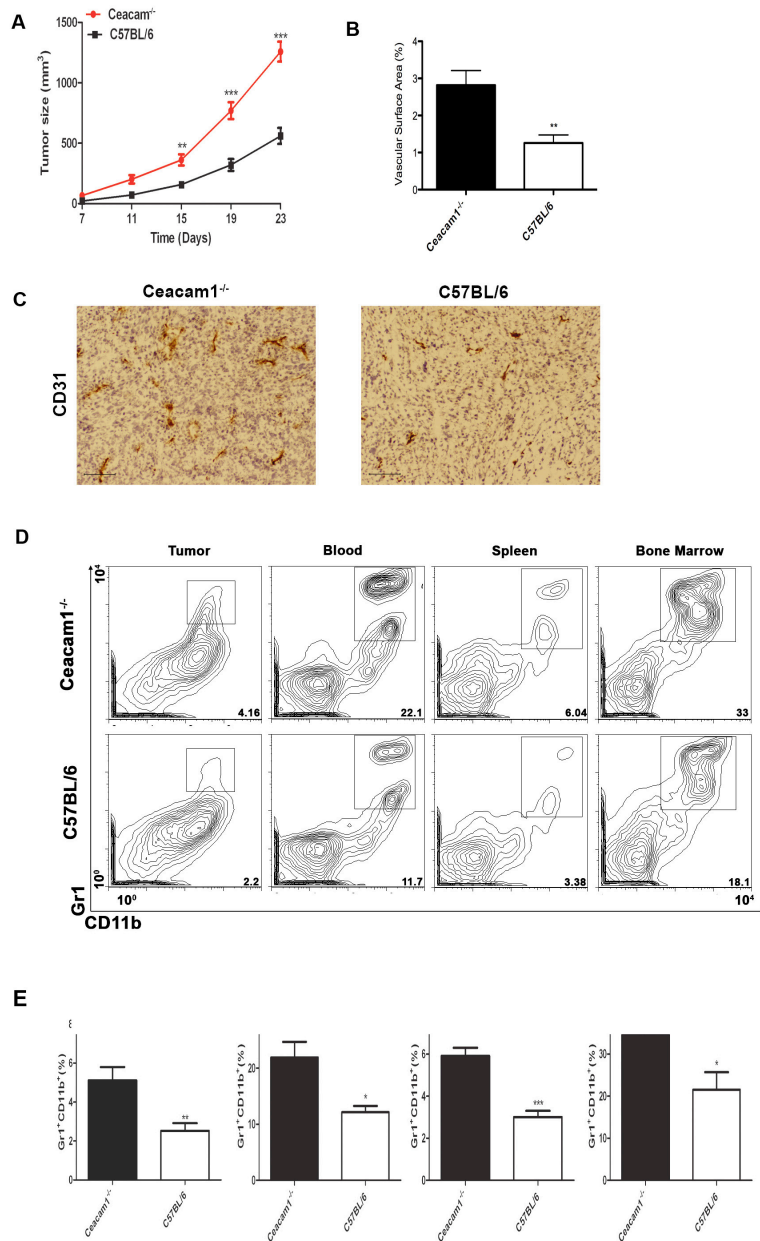

**Figure S6. MC38 colon tumor growth and angiogenesis are enhanced in Ceacam1<sup>-/-</sup> mice.** (A) MC38 colon tumor cells were implanted s.c. into Ceacam1<sup>-/-</sup> and C57BL/6 mice and tumor growth was measured (n=6 mice per group from three independent experiments). Data represent mean  $\pm$  SEM. \*\*0.001 < P  $\leq$  0.01, \*\*\* P  $\leq$  0.001. (B) Blood vessels in tumors were counted based on the immunohistological analysis with anti-CD31 of frozen tumor tissue collected from mice in (A) after 23 days. More than 8 fields of view were analyzed. Data represent mean  $\pm$  SEM, \*\*0.001 < P  $\leq$  0.01. (C) Immunohistochemistry staining of mouse MC38 tumor tissue collected from mice in (A) after 23 days with anti-CD31 antibody. (D) Representative flow cytometric analysis showing Gr1<sup>+</sup>CD11b<sup>+</sup> myeloid population Ceacam1<sup>-/-</sup> and C57BL/6 tumor-bearing mice. The mean percentage of Gr1<sup>+</sup>CD11b<sup>+</sup> cells is shown in (E), (n=8 mice per group from two independent experiments). Data represent mean  $\pm$  SEM. \*0.01 < P  $\leq$  0.05, \*\*0.001 < P  $\leq$  0.01 \*\*\* P  $\leq$  0.001.
